# Odd-skipped genes specify the signaling center that triggers retinogenesis in *Drosophila*

Catarina Bras-Pereira<sup>1,2</sup>, Jose Bessa<sup>1</sup> and Fernando Casares<sup>1,3,\*</sup>

Although many of the factors responsible for conferring identity to the eye field in *Drosophila* have been identified, much less is known about how the expression of the retinal 'trigger', the signaling molecule Hedgehog, is controlled. Here, we show that the co-expression of the conserved odd-skipped family genes at the posterior margin of the eye field is required to activate *hedgehog* expression and thereby the onset of retinogenesis. The fly Wnt1 homologue *wingless* represses the odd-skipped genes *drm* and *odd* along the anterior margin and, in this manner, spatially restricts the extent of retinal differentiation within the eye field.

**KEY WORDS:** Retinal differentiation, Eye, *Drosophila*, odd genes, Hedgehog, *wingless*

## INTRODUCTION

In *Drosophila*, the eye primordium is specified as a subdomain of the *Pax6*-expressing cells in the center of the eye disc, by the co-expression of a set of retinal determination genes (Bonini et al., 1993; Cheyette et al., 1994; Dominguez and Casares, 2005; Halder et al., 1998; Mardon et al., 1994; Pappu and Mardon, 2004). Then, retinogenesis is triggered by the *hedgehog* (*hh*) and the *hh* target *decapentaplegic* (*Dpp/Bmp4*) signals that are produced by the surrounding posterior margin cells (Fig. 1A), at the so-called 'firing point' (Treisman and Heberlein, 1998). These margin cells about the eye primordium and give rise to part of the adult head capsule surrounding the eye (Haynie and Bryant, 1986). Once initiated, retinal differentiation propagates in a posterior-to-anterior wave (Fig. 1B,C), with the differentiation wavefront marked by an epithelial indentation: the morphogenetic furrow (MF) (Treisman and Heberlein, 1998). The gene(s) responsible for this specialization of the posterior margin are unknown.

## MATERIALS AND METHODS

### *Drosophila* strains

*odd<sup>5</sup>*, *drm<sup>6</sup>*, *bowl<sup>1</sup>*, *wg<sup>1-16</sup>* (*wg<sup>CX3</sup>*), *odd<sup>K111</sup>* (*oddZ*), *hhP30* (*hhZ*), *dppBS3.0* (*dppZ*), *P{en1}wgen11* (*wgZ*), *P{GAL4}hhGal4* (*hh-GAL4*) are described in FlyBase. *Df(2L)drmP2* (Green et al., 2002; Hao et al., 2003) deletes from *tim* to *odd*, and uncovers ~30 predicted genes, including *drm*, *sob* and *odd*. UAS strains were UAS-*odd(A)* and UAS-*sob(6)* (Hao et al., 2003), UAS-*bowl(1.1)* (de Celis Ibeas and Bray, 2003), UAS-*drm* (on the III) and UAS-*lines* (Green et al., 2002; Hatini et al., 2000), and UAS-*Src-GFP* (Kaltschmidt et al., 2000). *odd-GAL4* faithfully reproduces *odd* expression (a gift from G. Morata and M. Calleja, CMB, Spain). *drm<sup>6</sup>* was recombined onto a *FRT40A* chromosome.

### Loss-of-function clones:

*odd<sup>5</sup>*, *drm<sup>6</sup>* and *bowl<sup>1</sup>* mitotic clones were induced between 24 and 48 hours after egg laying (AEL) by a 45 minute 37°C heat-shock in larvae from the crosses of *odd\* FRT 40A/balancer* males to *yw hsFLP 122; Ubi-GFP FRT40A* females (*odd\** represents each of the alleles used). *DfdrmP2* cells do not survive unless given a growth advantage, for which we used the 'Minute technique' (Morata and Ripoll, 1975). Clones were induced between 24 and 72 hours AEL by a 20 minute 37°C heat-shock in larvae

from the crosses of *odd\* FRT40A* males to *yw, hsFLP122; M armZ FRT40A* females. In some experiments, we used *yw ey-FLP* as flipase source (Newsome et al., 2000) to maximize the amount of mutant tissue in eye discs. Mutant cells were identified by the absence of β-galactosidase (*armZ*).

### Ectopic-expression ('flip-out') clones of odd-family genes and lines

These clones were induced between 24 and 48 hours AEL (L1 stage) in larvae from the crosses between UAS-*odd\** (where *odd\** means *odd*, *drm*, *sob* or *bowl*) or UAS-*lines* males and *y, hsFLP122, actinP>hsCD2>Gal4* females (Basler and Struhl, 1994). Clones were marked negatively by the absence of CD2 (CD2 was induced by a 45 minute 37°C heat-shock, followed by 45 minutes recovery at room temperature). The *hhZ*, *dppZ* or *oddZ* reporters were introduced in the genotypes of some experiments. The overexpression of *drm* in *bowl<sup>1</sup>* cells was achieved using the MARCM technique (Lee and Luo, 2001). UAS-*drm* was balanced over *TM6B, Tb*, so *drm*-expressing larvae were *Tb<sup>+</sup>*. Clones were marked positively by expression of GFP.

### Antibodies

We used rabbit anti-β-gal (Cappel), mouse anti-β-gal (Sigma), rabbit anti-GFP (Molecular Probes), mouse anti-CD2 (Serotec), guinea pig anti-Odd (Kosman et al., 1998) and mouse anti-Ptc (Nakano et al., 1989). Rat anti-Elav, mouse anti-Wg (4D4) and mouse anti-Eya are from the Iowa University Studies Hybridoma Bank. RNA probes for *odd*, *drm*, *sob* and *bowl* were as described previously (Hao et al., 2003). Phalloidin-FITC was used to mark filamentous actin. Appropriate fluorescent secondary antibodies were from Molecular Probes. Anti-mouse-HRP (Sigma) was used for immunoperoxidase staining.

## RESULTS AND DISCUSSION

### *bowl*, *odd*, *drm* and *sob* are expressed in the margin-peripodial cells in early eye discs, but their expression patterns differ later on in development

The eye disc is a flat epithelial sac. By early third larval stage (L3), columnar cells in the bottom (disc proper: Dp) layer are separated by a crease from the surrounding rim of cuboidal margin cells. Margin cells continue seamlessly into the upper (peripodial; Pe) layer of squamous cells (Fig. 1C-G). The Dp will differentiate into the eye, while the margin and Pe will form the head capsule (Haynie and Bryant, 1986). In addition, the posterior margin produces retinal-inducing signals (Treisman and Heberlein, 1998).

By examining gene reporters we found that the zinc-finger gene *odd-skipped* (*odd*) is expressed restricted to the posterior margin and Pe of L3 eye discs (Fig. 1). As the odd family members *drumstick*

<sup>1</sup>CABD-Andalusian Centre for Developmental Biology, UPO-CSIC, Sevilla 41013, Spain. <sup>2</sup>PDBEB, University of Coimbra, Portugal. <sup>3</sup>BMC, Porto 4150-180, Portugal.

\*Author for correspondence (e-mail: fcasfer@upo.es)

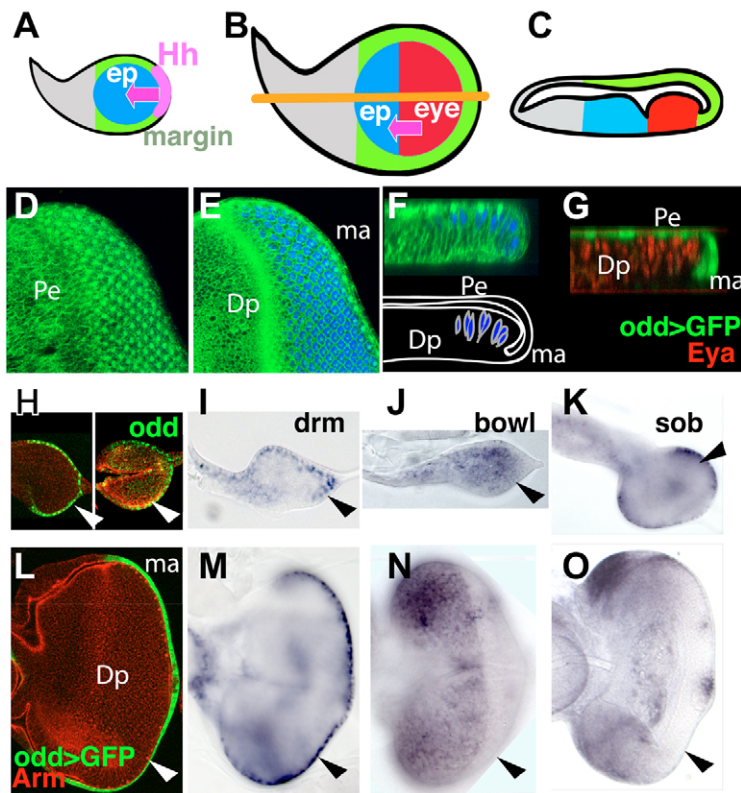

**Fig. 1. Expression of the odd-genes is associated to the margin-peripodial cells of the eye disc during development.** (A,B) Schemes of late L2/early L3 (A) and late L3 (B) eye discs. (A) Posterior margin cells trigger retinogenesis in the adjacent eye primordium (ep) by producing Hh. (B) Once triggered, retinal differentiation progresses anteriorly (eye). (C) Cross-section through the line in B shows the peripodial and margin cells (green) overlaying the differentiating eye primordium. (D,E) Confocal images of the posterior region of a third larval stage (L3) disc through the peripodial (Pe, D) and disc proper (Dp, E) layers, stained with phalloidin-FITC and Elav (a photoreceptor marker used in this and following figures). The margin (ma) is a thin strip of cells adjacent to the posterior-most row of photoreceptors. (F) Confocal z-section through the same disc showing the three cell types (schematized below). (G) Confocal z-section through the posterior region of a L3 *odd-GAL4>GFP* disc, co-stained with Eya. *odd* is restricted to the Pe and margin. (H-O) Patterns of expression of the four odd genes in L2 (H-K) and L3 (L-O). Expression of *odd* is monitored by the *odd-GAL4* reporter (H, left; L) or with an anti-Odd antibody (H, right), and that of *drm* (I,M), *bowl* (J,N) and *sob* (K,O) by RNA in situ hybridization. The patterns of *drm* and *odd* seem identical. (H, left) Propidium iodide marks nuclei. (H, right) Rhodamine-phalloidin stains actin. (L) Arm expression marks cell membranes. Arrowheads indicate the margins. Discs are oriented with posterior towards the right and dorsal upwards.

(*drm*), brother of *odd* with entrails limited (*bowl*) and sister of *odd* and *bowl* (*sob*) are similarly expressed in leg discs (de Celis Ibeas and Bray, 2003; Hao et al., 2003), we examined them in eye discs. In L2, before retinogenesis has started, *odd* and *drm* are transcribed in the posterior Pe-margin (Fig. 1H,I), and this continues within the posterior margin after MF initiation (Fig. 1L,M). *bowl* is transcribed in all eye disc Pe-margin cells of L2 discs (Fig. 1J), but retracts anteriorly along the margins and Pe after the MF passes (Fig. 1N). In addition, *bowl* is expressed weakly in the Dp anterior to the furrow. *sob* expression in L2 and L3 is mostly seen along the lateral disc margins (Fig. 1K,O). Therefore *drm*, *odd* and *bowl* are co-expressed at the posterior margin prior to retinal differentiation initiation.

### ***bowl* is required for hedgehog expression in margin cells and for triggering retinal differentiation**

Odd family genes regulate diverse embryonic processes, as well as imaginal leg segmentation (de Celis Ibeas and Bray, 2003; Green et al., 2002; Hao et al., 2003; Hatini et al., 2005; Johansen et al., 2003). Bowl is required for all these processes (Green et al., 2002; Hao et al., 2003). In embryos, the product of the gene *lines* (Bokor and DiNardo, 1996) binds to Bowl and represses its activity, while Dm relieves this repression in *drm*-expressing cells (Hatini et al., 2005). As *drm/odd/bowl* expression coincides along the posterior margin around the time retinal induction is triggered, we asked whether they controlled this triggering. First, we removed *bowl* function in marked cell clones induced in L1. *bowl<sup>-</sup>* clones spanning the margin, but not those in the DP, cause either a delay in, or the inhibition of, retinal initiation (Fig. 2A,B) and the autonomous loss of *hh-Z* expression (Fig. 2C,E). Correspondingly, there is a reduction in expression of the *hh*-target *patched* (*ptc*) (Fig. 2D). These effects on *hh* and *ptc* are not due to the loss of

margin cells, as *drm* is still expressed in the *bowl<sup>-</sup>* cells (not shown). The requirement of Bowl for *hh* expression is margin specific, as other *hh*-expressing domains within the disc (Royet and Finkelstein, 1997) are not affected by the loss of *bowl* (not shown). As expected from the *bowl*-repressing function of *lines* (Green et al., 2002; Hatini et al., 2005), the overexpression of *lines* along the margin phenocopies the loss of *bowl* (Fig. 2F). Nevertheless, the overexpression of *bowl* in other eye disc regions is not sufficient to induce *hh* (not shown). This suggests that, in regions other than the margin, either the levels of *lines* are too high to be overcome by *bowl* or *bowl* requires other factors to induce *hh*, or both.

### ***drm* and *odd* are required for and sufficient to initiate retinogenesis**

*drm* and *odd* are expressed together along the posterior disc margin-Pe (Fig. 1), and *drm* (at least) is required for Bowl stabilization in leg discs (Hatini et al., 2005). Nevertheless, the removal of neither *drm* (Fig. 3A) nor *odd* (not shown) function alone results in retinal defects. *odd* and *drm* may act redundantly during leg segmentation (Hao et al., 2003) and this may also be the case in the eye margin. To test this, we induced clones of *DfdrmP2*, a deficiency that deletes *drm*, *sob* and *odd*, plus other genes (Green et al., 2002). When *DfdrmP2* clones affect the margin, the adjacent retina fails to differentiate, suggesting that *drm* and *odd* (and perhaps *sob*, for which no single mutation is available) act redundantly to promote *bowl* activity at the margin (Fig. 3B,C) (although we cannot exclude that other genes uncovered by this deficiency also contribute to the phenotype). To test the function of each of these genes, we expressed *drm*, *odd* and *sob* in cell clones elsewhere in the eye disc. Only the overexpression of *drm* or *odd* induced ectopic retinogenesis (Fig. 3D and not shown), and this was restricted to the region immediately anterior to the MF, which is already eye



committed. Interestingly, *bowl* is also expressed in this region of L3 discs (Fig. 3E). The retina-inducing ability of *drm* requires *bowl*, because retinogenesis is no longer induced in *drm*-expressing clones that simultaneously lack *bowl* function (Fig. 3F). Therefore, it seems that in the eye, *drm* (and very likely also *odd*) also promotes *bowl* function.

The expression of *hh* (Heberlein et al., 1995) or activation of its pathway (Chanut and Heberlein, 1995; Dominguez and Hafen, 1997; Ma and Moses, 1995; Pan and Rubin, 1995; Strutt and Mlodzik, 1995; Wehrli and Tomlinson, 1995) anterior to the furrow is sufficient to generate ectopic retinal differentiation. As (1) *bowl* is required for *hh* expression at the margin, (2) this *hh* expression is

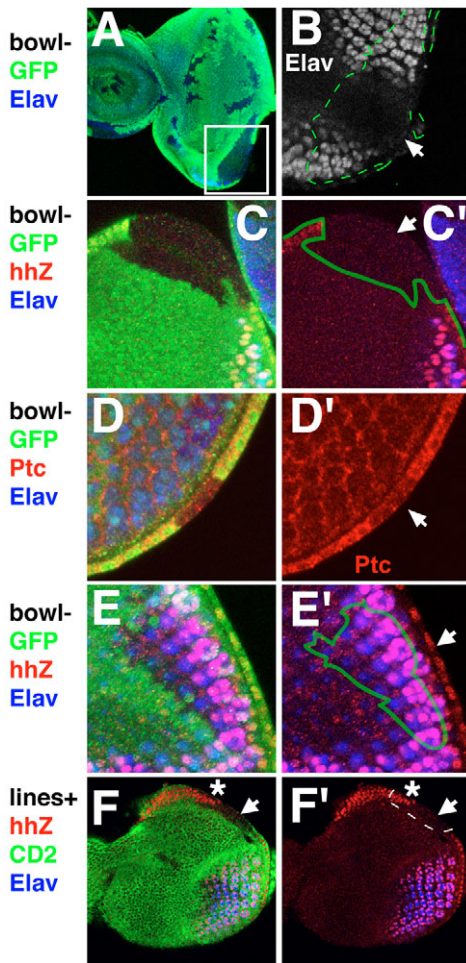

**Fig. 2. *bowl* is required specifically at the margin for retinal triggering and *hh* expression.** Clones are marked by the absence of GFP (A-E) or CD2 (F). (A-E) *bowl<sup>-</sup>* clones spanning the posterior margin. (A, inset in B) Defective retinal initiation is associated with *bowl<sup>-</sup>* mutant margin (arrow). Retinal initiation is partially rescued non-autonomously by neighboring tissue (clone outlined in B). (C, C') *bowl<sup>-</sup>* clone spanning the margin loses *hh-Z* autonomously (arrow; clone outlined in C'). (D, D') The expression of *Ptc* is also reduced in a *bowl<sup>-</sup>* clone (arrow). (E, E') Internal *bowl<sup>-</sup>* clone abutting, but not including, the margin develops retina normally (clone outlined in E'). The *hh-Z* margin expression (arrow) is normal. (F, F') *lines*-expressing clone at the margin resembles loss of *bowl*, causing loss of margin *hh-Z* and retinal failure (arrow). The *hh-Z* ocellar expression is not affected (asterisk). Discs are oriented with posterior towards the right and dorsal upwards.

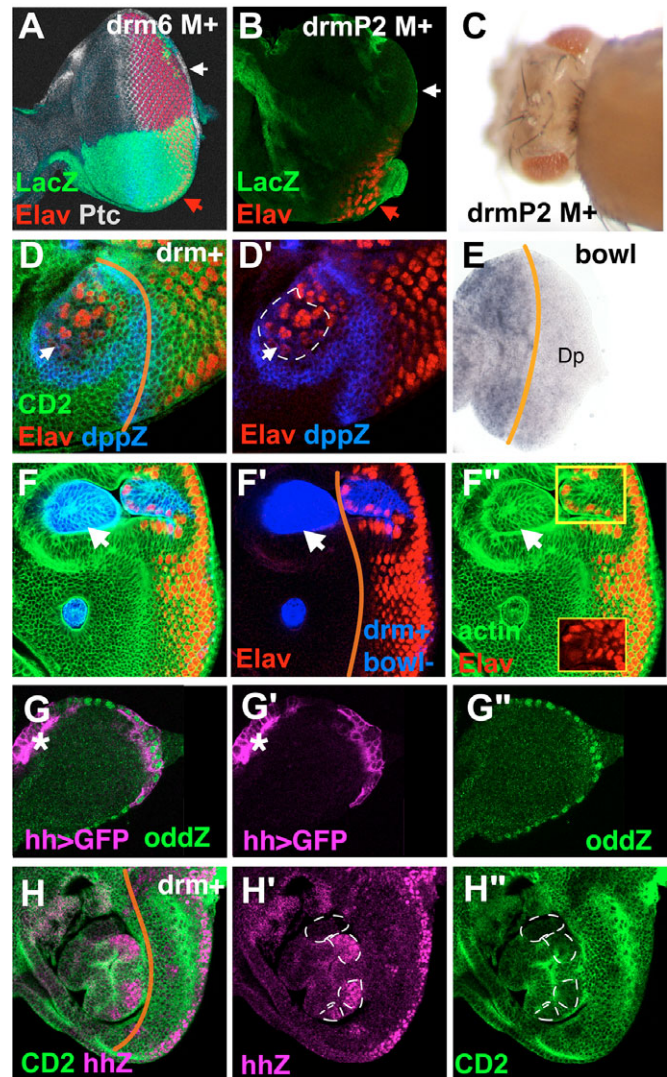

**Fig. 3. *drm* and *odd* regulate *hh* expression, probably through enabling *bowl* function.** (A, B) Eye discs containing *M+* clones mutant for (A) *drm<sup>6</sup>* or (B) *DfdrmP2* (marked by absence of *lacZ*). (A) No effect on retinogenesis or *Ptc* expression is seen adjacent to *drm*-mutant margin. (Similar results were obtained for *odd<sup>Δ</sup>*.) (B) Retinogenesis fails when the adjacent margin is mutant for *DfdrmP2*. White and red arrows indicate mutant and wild-type margin, respectively. (C) Adult head from the *DfdrmP2*, *M+* experiment showing severely reduced eyes. (D, D') *drm*-expressing clone (absence of CD2, and outlined in D') induces an ectopic furrow (marked by *dpp-Z*) and associated retinogenesis (detected by Elav). The line indicates the position of the endogenous furrow (D). (E) Disc proper (Dp) expression of *bowl* mRNA is detected anterior to the furrow (line) in late L3 discs. (F-F'') *drm<sup>+</sup> bowl<sup>-</sup>* clones (blue) do not induce ectopic retinal differentiation anterior to the morphogenetic furrow (arrow; line indicates the furrow). Phalloidin stains actin. A *drm<sup>+</sup> bowl<sup>-</sup>* clone located immediately after the furrow (boxed) shows Elav-positive neurons (inset). (G-G'') L2 eye disc from *oddZ/UAS-GFP*; *hh-GAL4* larvae shows extensive overlap of *hh* and *odd* at the posterior margin. Asterisk indicates the *hh* ocellar domain, which, at this stage, does not express *odd-Z*. (H-H'') Most *drm*-expressing clones (absence of CD2, outlined in H' and H'') induce *hh-Z* expression just anterior to the morphogenetic furrow (line). Discs are oriented with posterior towards the right and dorsal upwards.

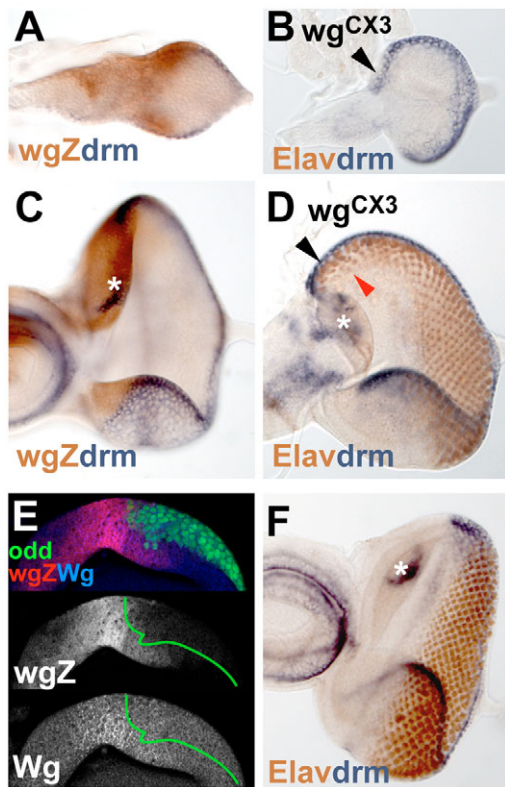

**Fig. 4. *wingless* represses *drm* transcription in anterior eye disc margin.** (A,B) Early and (C-F) late L3 discs. (A) In *wg-Z* discs ( $\beta$ -galactosidase, orange), prior to the initiation of retinal differentiation, *drm* and *wg* expressions are complementary. (C) In late L3 discs, this complementarity is maintained with the exception of the appearance of a dorsal head *drm*-expressing patch (asterisk in C,D,F). (B) In early L3 *wgCX3* discs, *drm* transcription extends dorsally to reach the antenna (black arrowhead) before retinogenesis starts. (D) In older discs, ectopic retinogenesis (red arrowhead) can be seen progressing from the *drm*-expressing anterior margin (black arrowhead). (E) Dorsal margin of an *odd-GAL4/wg-Z; UAS-GFP* L3 disc. *odd* reporter expression (green and outlined in by the green line in the single channel panels) is complementary to both *wg* transcription (*wg-Z*) and protein expression (*Wg*). (F) A late wild-type L3 disc stained for *drm* and *Elav* is shown for comparison. Discs are oriented with posterior towards the right and dorsal upwards.

largely coincident with that of *odd* and *drm* (Fig. 3G), and (3) *drm* (and possibly *odd*) functionally interacts with *bowl*, we checked whether *drm*- and *odd*-expressing clones induced the expression of *hh*. In both types of clones *hh* expression is turned on autonomously, as detected with *hh-Z* (shown for *drm* in Fig. 3H), which would thus be responsible for the ectopic retinogenesis observed. That the normal *drm/odd/bowl*-expressing margin does not differentiate as eye could be explained if margin cells lack certain eye primordium-specific factors.

#### ***wingless* represses *drm* transcription along the anterior dorsal eye disc margin**

Our results indicate that the expression of *odd* and *drm* defines during L2 the region of the *bowl*-expressing margin that is competent to induce retinogenesis. How is their expression controlled? *wingless* (*wg*) is expressed in the anterior margin, where it prevents the start of retinal differentiation (Ma and Moses, 1995;

Treisman and Rubin, 1995). *drm/odd* are complementary to *wg* (monitored by *wgZ*) during early L3, when retinal differentiation is about to start, and also during later stages (Fig. 4A,C,E). In addition, when *wg* expression is reduced during larval life in *wgCX3* mutants, *drm* transcription is extended all the way anteriorly (Fig. 4B,D). This extension precedes and prefigures the ectopic retinal differentiation that, in these mutants, occurs along the dorsal margin (Fig. 4B,D,F). Therefore, *wg* could repress anterior retinal differentiation by blocking the expression of *odd* genes in the anterior disc margin, in addition to its known role in repressing *dpp* expression and signaling (Hazelett et al., 1998; Treisman and Rubin, 1995).

Interestingly, the onset of retinogenesis in L3 is delayed relative to the initiation of the expression of *drm/odd* (this work) and *hh* (Cavodeassi et al., 1999; Cho et al., 2000) in L1-2. This delay can be explained in three, not mutually exclusive, ways. First, the relevant margin factors (i.e. *drm/odd*, *hh*) might be in place early, but the eye primordium might become competent to respond to them later. In fact, *wg* expression domain has to retract anteriorly as the eye disc grows, under *Notch* signaling influence, to allow the expression of eye-competence factors (Kenyon et al., 2003). Second, building up a concentration of margin factors sufficient to trigger retinogenesis might require some time. In fact, the activity of the *Notch* pathway along the prospective dorsoventral border is required to reinforce *hh* transcription at the firing point (Cavodeassi et al., 1999). Third, other limiting factors might exist whose activity becomes available only during L3. Such a factor might be the EGF receptor pathway, which is involved in the triggering and reincarnation of the furrow along the margins during L3 (Kumar and Moses, 2001).

In addition to *hh*, other genes are required for retinal triggering, including *dpp* (Burke and Basler, 1996; Pignoni and Zipursky, 1997; Wiersdorff et al., 1996), *eyes absent* (*eya*) (Bonini et al., 1993) and the target of *eya dachshund* (*dac*) (Mardon et al., 1994; Pignoni et al., 1997). These genes are expressed in both the posterior region of the eye primordium and the posterior margin. In addition to their role in eye specification, they might also specify the margin. Although the regulatory relationships between *hh* and *dpp*, or *dpp* and *eya* are obscured by cross-regulatory interactions (Borod and Heberlein, 1998; Chen et al., 1999; Curtiss and Mlodzik, 2000; Hazelett et al., 1998; Pignoni and Zipursky, 1997), recent functional data indicate that *dpp* and *eya* are functionally downstream of *hh* (Pappu et al., 2003). The possibility that the *odd* genes control the expression or function of *dpp* and *eya* at the margin remains to be tested.

We are grateful to A. Casali, S. Bray, M. Calleja, I. Guerrero, V. Hatini, G. Morata, C. Rauskolb, J. Reinitz and I. Rodríguez for reagents, and to J. L. Gomez-Skarmeta, F. Pichaud and C. Rauskolb and members of the laboratory for comments. This work has been funded through grants BMC2003-06248 (Ministerio de Educación y Ciencia, Spain) and POCT/BIA-BCM/56043/2004 [Fundação para a Ciência e a Tecnologia (FCT), Portugal], which are co-funded by FEDER, to F.C. C.B-P. and J.B. are funded by FCT.

#### **References**

- Basler, K. and Struhl, G. (1994). Compartment boundaries and the control of *Drosophila* limb pattern by hedgehog protein. *Nature* **368**, 208-214.
- Bokor, P. and DiNardo, S. (1996). The roles of hedgehog, wingless and lines in patterning the dorsal epidermis in *Drosophila*. *Development* **122**, 1083-1092.
- Bonini, N. M., Leiserson, W. M. and Benzer, S. (1993). The eyes absent gene: genetic control of cell survival and differentiation in the developing *Drosophila* eye. *Cell* **72**, 379-395.
- Borod, E. R. and Heberlein, U. (1998). Mutual regulation of decapentaplegic and hedgehog during the initiation of differentiation in the *Drosophila* retina. *Dev. Biol.* **197**, 187-197.
- Burke, R. and Basler, K. (1996). Dpp receptors are autonomously required for cell



- proliferation in the entire developing *Drosophila* wing. *Development* **122**, 2261-2269.
- Cavodeassi, F., Diez Del Corral, R., Campuzano, S. and Dominguez, M.** (1999). Compartments and organising boundaries in the *Drosophila* eye: the role of the homeodomain Iroquois proteins. *Development* **126**, 4933-4942.
- Chanut, F. and Heberlein, U.** (1995). Role of the morphogenetic furrow in establishing polarity in the *Drosophila* eye. *Development* **121**, 4085-4094.
- Chen, R., Halder, G., Zhang, Z. and Mardon, G.** (1999). Signaling by the TGF- $\beta$  homolog decapentaplegic functions reiteratively within the network of genes controlling retinal cell fate determination in *Drosophila*. *Development* **126**, 935-943.
- Cheyette, B. N., Green, P. J., Martin, K., Garren, H., Hartenstein, V. and Zipursky, S. L.** (1994). The *Drosophila* sine oculis locus encodes a homeodomain-containing protein required for the development of the entire visual system. *Neuron* **12**, 977-996.
- Cho, K. O., Chern, J., Izaddoost, S. and Choi, K. W.** (2000). Novel signaling from the peripodial membrane is essential for eye disc patterning in *Drosophila*. *Cell* **103**, 331-342.
- Curtiss, J. and Mlodzik, M.** (2000). Morphogenetic furrow initiation and progression during eye development in *Drosophila*: the roles of decapentaplegic, hedgehog and eyes absent. *Development* **127**, 1325-1336.
- de Celis Ibeas, J. M. and Bray, S. J.** (2003). Bowl is required downstream of Notch for elaboration of distal limb patterning. *Development* **130**, 5943-5952.
- Dominguez, M. and Hafen, E.** (1997). Hedgehog directly controls initiation and propagation of retinal differentiation in the *Drosophila* eye. *Genes Dev.* **11**, 3254-3264.
- Dominguez, M. and Casares, F.** (2005). Organ specification-growth control connection: new in-sights from the *Drosophila* eye-antennal disc. *Dev. Dyn.* **232**, 673-684.
- Green, R. B., Hatini, V., Johansen, K. A., Liu, X. J. and Lengyel, J. A.** (2002). Drumstick is a zinc finger protein that antagonizes Lines to control patterning and morphogenesis of the *Drosophila* hindgut. *Development* **129**, 3645-3656.
- Halder, G., Callaerts, P., Flister, S., Walldorf, U., Kloter, U. and Gehring, W. J.** (1998). Eyeless initiates the expression of both sine oculis and eyes absent during *Drosophila* compound eye development. *Development* **125**, 2181-2191.
- Hao, I., Green, R. B., Dunaevsky, O., Lengyel, J. A. and Rauskolb, C.** (2003). The odd-skipped family of zinc finger genes promotes *Drosophila* leg segmentation. *Dev. Biol.* **263**, 282-295.
- Hatini, V., Green, R. B., Lengyel, J. A., Bray, S. J. and Dinardo, S.** (2005). The Drumstick/Lines/Bowl regulatory pathway links antagonistic Hedgehog and Wingless signaling inputs to epidermal cell differentiation. *Genes Dev.* **19**, 709-718.
- Haynie, J. L. and Bryant, P. J.** (1986). Development of the eye-antenna imaginal disc and morphogenesis of the adult head in *Drosophila melanogaster*. *J. Exp. Zool.* **237**, 293-308.
- Hazelett, D. J., Bourouis, M., Walldorf, U. and Treisman, J. E.** (1998). decapentaplegic and wingless are regulated by eyes absent and eyegone and interact to direct the pattern of retinal differentiation in the eye disc. *Development* **125**, 3741-3751.
- Heberlein, U., Singh, C. M., Luk, A. Y. and Donohoe, T. J.** (1995). Growth and differentiation in the *Drosophila* eye coordinated by hedgehog. *Nature* **373**, 709-711.
- Johansen, K. A., Green, R. B., Iwaki, D. D., Hernandez, J. B. and Lengyel, J. A.** (2003). The Drm-Bowl-Lin relief-of-repression hierarchy controls fore- and hindgut patterning and morphogenesis. *Mech. Dev.* **120**, 1139-1151.
- Kaltschmidt, J. A., Davidson, C. M., Brown, N. H. and Brand, A. H.** (2000). Rotation and asymmetry of the mitotic spindle direct asymmetric cell division in the developing central nervous system. *Nat. Cell Biol.* **2**, 7-12.
- Kenyon, K. L., Ranade, S. S., Curtiss, J., Mlodzik, M. and Pignoni, F.** (2003). Coordinating proliferation and tissue specification to promote regional identity in the *Drosophila* head. *Dev. Cell* **5**, 403-414.
- Kosman, D., Small, S. and Reinitz, J.** (1998). Rapid preparation of a panel of polyclonal antibodies to *Drosophila* segmentation proteins. *Dev. Genes Evol.* **208**, 290-294.
- Kumar, J. P. and Moses, K.** (2001). The EGF receptor and notch signaling pathways control the initiation of the morphogenetic furrow during *Drosophila* eye development. *Development* **128**, 2689-2697.
- Lee, T. and Luo, L.** (2001). Mosaic analysis with a repressible cell marker (MARCM) for *Drosophila* neural development. *Trends Neurosci.* **24**, 251-254.
- Ma, C. and Moses, K.** (1995). Wingless and patched are negative regulators of the morphogenetic furrow and can affect tissue polarity in the developing *Drosophila* compound eye. *Development* **121**, 2279-2289.
- Mardon, G., Solomon, N. M. and Rubin, G. M.** (1994). dachshund encodes a nuclear protein required for normal eye and leg development in *Drosophila*. *Development* **120**, 3473-3486.
- Morata, G. and Ripoll, P.** (1975). Minutes: mutants of *Drosophila* autonomously affecting cell division rate. *Dev. Biol.* **42**, 211-221.
- Nakano, Y., Guerrero, I., Hidalgo, A., Taylor, A., Whittle, J. R. and Ingham, P. W.** (1989). A protein with several possible membrane-spanning domains encoded by the *Drosophila* segment polarity gene patched. *Nature* **341**, 508-513.
- Newsome, T. P., Asling, B. and Dickson, B. J.** (2000). Analysis of *Drosophila* photoreceptor axon guidance in eye-specific mosaics. *Development* **127**, 851-860.
- Pan, D. and Rubin, G. M.** (1995). cAMP-dependent protein kinase and hedgehog act antagonistically in regulating decapentaplegic transcription in *Drosophila* imaginal discs. *Cell* **80**, 543-552.
- Pappu, K. S. and Mardon, G.** (2004). Genetic control of retinal specification and determination in *Drosophila*. *Int. J. Dev. Biol.* **48**, 913-924.
- Pappu, K. S., Chen, R., Middlebrooks, B. W., Woo, C., Heberlein, U. and Mardon, G.** (2003). Mechanism of hedgehog signaling during *Drosophila* eye development. *Development* **130**, 3053-3062.
- Pignoni, F. and Zipursky, S. L.** (1997). Induction of *Drosophila* eye development by decapentaplegic. *Development* **124**, 271-278.
- Pignoni, F., Hu, B., Zavitz, K. H., Xiao, J., Garrity, P. A. and Zipursky, S. L.** (1997). The eye-specification proteins So and Eya form a complex and regulate multiple steps in *Drosophila* eye development. *Cell* **91**, 881-891.
- Royet, J. and Finkelstein, R.** (1997). Establishing primordia in the *Drosophila* eye-antennal imaginal disc: the roles of decapentaplegic, wingless and hedgehog. *Development* **124**, 4793-4800.
- Strutt, D. I. and Mlodzik, M.** (1995). Ommatidial polarity in the *Drosophila* eye is determined by the direction of furrow progression and local interactions. *Development* **121**, 4247-4256.
- Treisman, J. E. and Rubin, G. M.** (1995). wingless inhibits morphogenetic furrow movement in the *Drosophila* eye disc. *Development* **121**, 3519-3527.
- Treisman, J. E. and Heberlein, U.** (1998). Eye development in *Drosophila*: formation of the eye field and control of differentiation. *Curr. Top. Dev. Biol.* **39**, 119-158.
- Wehrli, M. and Tomlinson, A.** (1995). Epithelial planar polarity in the developing *Drosophila* eye. *Development* **121**, 2451-2459.
- Wiersdorff, V., Lecuit, T., Cohen, S. M. and Mlodzik, M.** (1996). Mad acts downstream of Dpp receptors, revealing a differential requirement for dpp signaling in initiation and propagation of morphogenesis in the *Drosophila* eye. *Development* **122**, 2153-2162.
